# Supplementary material for: OPA1: 516 unique variants and 831 patients registered in an updated centralized Variome database
Source: Springer Nature journal article supplement (doi:10.1186/s13023-019-1187-1), 2019-09-10
Supplement: MOESM1 [file 17158172]

**Additional file 1** Variants listed in the *OPAI* database that are unpublished in the literature (count: 149).

| Exon/<br>Intron        | DNA Variant <sup>a</sup>                  | RNA<br>Variant <sup>a</sup> | Effect on Protein <sup>a,b</sup> | Classification of<br>Variant <sup>c</sup> | Domain<br>affected <sup>d</sup>                             | Database-ID <sup>e</sup> | Remarks                                         |
|------------------------|-------------------------------------------|-----------------------------|----------------------------------|-------------------------------------------|-------------------------------------------------------------|--------------------------|-------------------------------------------------|
| Exon 1                 | c.3G>A                                    | r.?                         | p.?                              | Pathogenic                                | Basic                                                       | OPA1_000348              | Variant in start codon                          |
| Exon 1                 | c.3G>T                                    | r.?                         | p.?                              | Likely pathogenic                         | Basic                                                       | OPA1_000328              | Variant in start codon                          |
| Exon 1                 | c.30del                                   | r.(?)                       | p.(Cys11Valfs*7)                 | Pathogenic                                | Basic                                                       | OPA1_000462              |                                                 |
| Intron 1-<br>Intron 3  | c.(32+1_33-<br>1)(448+1_449-<br>1)del     | r.spl                       | p.?                              | Likely pathogenic                         | Basic                                                       | OPA1_000349              | Large deletion of exons 2–<br>3 <sup>f</sup>    |
| Intron 1-<br>Intron 29 | c.(32+1_33-<br>1)(2983+1_2984-<br>1)dup   | r.?                         | p.?                              | Likely pathogenic                         | Basic,<br>GTPase,<br>Dynamin<br>Central,<br>Putative<br>GED | OPA1_000273              | Large duplication of exons<br>2–29 <sup>f</sup> |
| Intron 1               | c.32+24C>G                                | r.(?)                       | p.(=)                            | VUS                                       | Basic                                                       | OPA1_000390              |                                                 |
| Intron 1               | c.32+87del                                | r.(?)                       | p.?                              | VUS                                       | Basic                                                       | OPA1_000333              |                                                 |
| Exon 2                 | c.43C>A                                   | r.(?)                       | p.(Gln15Lys)                     | Benign                                    | Basic                                                       | OPA1_000318              |                                                 |
| Exon 2                 | c.50T>G                                   | r.(?)                       | p.(Leu17*)                       | Pathogenic                                | Basic                                                       | OPA1_000465              |                                                 |
| Exon 2                 | c.70A>G                                   | r.(?)                       | p.(Ile24Val)                     | Likely benign                             | Basic                                                       | OPA1_000321              |                                                 |
| Exon 2                 | c.108_125del                              | r.(?)                       | p.(Arg38_Ser43del)               | VUS                                       | Basic                                                       | OPA1_000397              |                                                 |
| Exon 2                 | c.143T>G                                  | r.(?)                       | p.(Leu48*)                       | Pathogenic                                | Basic                                                       | OPA1_000467              |                                                 |
| Exon 2                 | c.224del                                  | r.(?)                       | p.(Phe75Serfs*19)                | Pathogenic                                | Basic                                                       | OPA1_000423              |                                                 |
| Exon 2                 | c.245A>G                                  | r.(?)                       | p.(Tyr82Cys)                     | Pathogenic                                | Basic                                                       | OPA1_000468              |                                                 |
| Exon 2                 | c.267G>A                                  | r.(?)                       | p.(Trp89*)                       | Pathogenic                                | Basic                                                       | OPA1_000327              |                                                 |
| Exon 3                 | c.357del                                  | r.(?)                       | p.(Phe119Leufs*7)                | Pathogenic                                | Basic                                                       | OPA1_000323              |                                                 |
| Exon 3                 | c.380C>T                                  | r.(?)                       | p.(Pro127Leu)                    | VUS                                       | Basic                                                       | OPA1_000389              |                                                 |
| Exon 3                 | c.381G>A                                  | r.(?)                       | p.(=)                            | Likely benign                             | Basic                                                       | OPA1_000336              |                                                 |
| Exon 3                 | c.419del                                  | r.(?)                       | p.(Val140Glyfs*24)               | Pathogenic                                | Basic                                                       | OPA1_000469              |                                                 |
| Exon 3                 | c.422G>A                                  | r.(?)                       | p.(Trp141*)                      | Pathogenic                                | Basic                                                       | OPA1_000470              |                                                 |
| Intron 3               | c.448+1G>T                                | r.(spl?)                    | p.?                              | Pathogenic                                |                                                             | OPA1_000418              |                                                 |
| Intron 3-<br>Intron 10 | c.(448+1_449-<br>1)(1035+1_1036-<br>1)dup | r.?                         | p.?                              | Likely pathogenic                         | GTPase                                                      | OPA1_000279              | Large duplication of exons<br>4–10 <sup>f</sup> |
| Exon 4                 | c.534A>G                                  | r.(?)                       | p.(=)                            | Likely benign                             |                                                             | OPA1_000341              |                                                 |
| Exon 5                 | c.592G>A                                  | r.(?)                       | p.(Asp198Asn)                    | VUS                                       |                                                             | OPA1_000398              |                                                 |
| Intron 6               | c.678+2T>G                                | r.spl                       | p.?                              | Likely pathogenic                         |                                                             | OPA1_000330              |                                                 |
| Intron 6               | c.679-8C>T                                | r.(=)                       | p.(=)                            | Benign                                    |                                                             | OPA1_000399              |                                                 |
| Exon 8                 | c.799A>T                                  | r.(?)                       | p.(Lys267*)                      | Pathogenic                                |                                                             | OPA1_000337              |                                                 |
| Exon 8                 | c.814C>T                                  | r.(?)                       | p.(Gln272*)                      | Pathogenic                                |                                                             | OPA1_000320              |                                                 |
| Exon 9                 | c.869G>A                                  | r.(?)                       | p.(Arg290Gln)                    | VUS                                       |                                                             | OPA1_000400              |                                                 |
| Exon 9                 | c.902T>G                                  | r.(?)                       | p.(Leu301*)                      | Pathogenic                                |                                                             | OPA1_000426              |                                                 |
| Exon 9                 | c.910C>T                                  | r.(?)                       | p.(Gln304*)                      | Pathogenic                                |                                                             | OPA1_000419              |                                                 |
| Exon 9                 | c.921_922del                              | r.(?)                       | p.(Asp307Glyfs*6)                | Pathogenic                                |                                                             | OPA1_000472              |                                                 |
| Intron 9               | c.949-3C>A                                | r.(spl?)                    | p.?                              | VUS                                       |                                                             | OPA1_000325              |                                                 |
| Exon 10                | c.971C>T                                  | r.(?)                       | p.(Ser324Phe)                    | Likely pathogenic                         | GTPase                                                      | OPA1_000272              |                                                 |
| Exon 10                | c.1017G>A                                 | r.(=)                       | p.(=)                            | Benign                                    | GTPase                                                      | OPA1_000401              |                                                 |
| Exon 10                | c.1018C>T                                 | r.(?)                       | p.(Gln340*)                      | Pathogenic                                | GTPase                                                      | OPA1_000474              |                                                 |
| Intron 10              | c.1035+1del                               | r.spl                       | p.(=)                            | Pathogenic                                | GTPase                                                      | OPA1_000475              |                                                 |
| Intron 10              | c.1035+2T>A                               | r.spl                       | p.?                              | Likely pathogenic                         | GTPase                                                      | OPA1_000278              |                                                 |
| Intron 10              | c.1035+3A>C                               | r.(spl?)                    | p.(=)                            | Pathogenic                                | GTPase                                                      | OPA1_000477              |                                                 |

|           |                            |          |                    |                   |        |             |
|-----------|----------------------------|----------|--------------------|-------------------|--------|-------------|
| Intron 10 | c.1035+20T>C               | r.(=)    | p.(=)              | Likely benign     | GTPase | OPA1_000403 |
| Exon 11   | c.1057A>G                  | r.(?)    | p.(Ser353Gly)      | Pathogenic        | GTPase | OPA1_000306 |
| Exon 11   | c.1058G>A                  | r.(?)    | p.(Ser353Asn)      | Likely pathogenic | GTPase | OPA1_000332 |
| Exon 11   | c.1060G>C                  | r.(?)    | p.(Ala354Pro)      | Pathogenic        | GTPase | OPA1_000376 |
| Exon 11   | c.1069A>C                  | r.(?)    | p.(Thr357Pro)      | VUS               | GTPase | OPA1_000377 |
| Exon 11   | c.1113del                  | r.(?)    | p.(Gly372Aspfs*5)  | Pathogenic        | GTPase | OPA1_000344 |
| Exon 11   | c.1130T>G                  | r.(?)    | p.(Met377Arg)      | VUS               | GTPase | OPA1_000395 |
| Intron 11 | c.1149+1G>A                | r.spl    | p.?                | Pathogenic        | GTPase | OPA1_000310 |
| Intron 11 | c.1149+1G>C                | r.spl    | p.(=)              | Pathogenic        | GTPase | OPA1_000479 |
| Exon 12   | c.1174C>G                  | r.(?)    | p.(His392Asp)      | Likely pathogenic | GTPase | OPA1_000357 |
| Exon 12   | c.1181C>A                  | r.(?)    | p.(Ala394Asp)      | VUS               | GTPase | OPA1_000314 |
| Exon 12   | c.1184T>C                  | r.(?)    | p.(Leu395Pro)      | VUS               | GTPase | OPA1_000342 |
| Exon 12   | c.1200del                  | r.(?)    | p.(Arg401Glyfs*14) | Pathogenic        | GTPase | OPA1_000480 |
| Intron 12 | c.1230+2T>A                | r.spl    | p.?                | Pathogenic        | GTPase | OPA1_000335 |
| Intron 12 | c.1230+5G>A                | r.(spl?) | p.?                | Pathogenic        | GTPase | OPA1_000392 |
| Intron 12 | c.1230+9A>G                | r.(=)    | p.(=)              | VUS               | GTPase | OPA1_000404 |
| Exon 13   | c.1231-15_1231-7delinsGCAG | r.(=)    | p.(=)              | Pathogenic        | GTPase | OPA1_000427 |
| Exon 13   | c.1232_1233dup             | r.(?)    | p.(Ala412Leufs*4)  | Pathogenic        | GTPase | OPA1_000424 |
| Exon 13   | c.1262G>A                  | r.(?)    | p.(Arg421Gln)      | Likely pathogenic | GTPase | OPA1_000420 |
| Exon 13   | c.1302T>G                  | r.(?)    | p.(=)              | Likely benign     | GTPase | OPA1_000329 |
| Exon 13   | c.1305G>C                  | r.(?)    | p.(Glu435Asp)      | Pathogenic        | GTPase | OPA1_000481 |
| Intron 13 | c.1306-45C>T               | r.(?)    | p.(=)              | Benign            | GTPase | OPA1_000393 |
| Exon 14   | c.1324A>T                  | r.(?)    | p.(Lys442*)        | Pathogenic        | GTPase | OPA1_000483 |
| Exon 14   | c.1342A>C                  | r.(?)    | p.(=)              | Likely benign     | GTPase | OPA1_000319 |
| Exon 14   | c.1364C>T                  | r.(?)    | p.(Pro455Leu)      | Pathogenic        | GTPase | OPA1_000486 |
| Exon 14   | c.1377del                  | r.(?)    | p.(Asn459Lysfs*3)  | Pathogenic        | GTPase | OPA1_000313 |
| Intron 14 | c.1377+2dup                | r.spl    | p.?                | Likely pathogenic | GTPase | OPA1_000354 |
| Intron 14 | c.1377+5G>A                | r.(spl?) | p.(=)              | VUS               | GTPase | OPA1_000353 |
| Intron 14 | c.1378-7_1378-4del         | r.(spl?) | p.?                | VUS               | GTPase | OPA1_000315 |
| Exon 15   | c.1379_1381delinsT         | r.(?)    | p.(Thr460Ilefs*8)  | Pathogenic        | GTPase | OPA1_000425 |
| Exon 15   | c.1391G>A                  | r.(?)    | p.(Gly464Asp)      | VUS               | GTPase | OPA1_000340 |
| Exon 15   | c.1392dup                  | r.(?)    | p.(Met465Hisfs*4)  | Pathogenic        | GTPase | OPA1_000489 |
| Exon 15   | c.1417del                  | r.(?)    | p.(Ile473Phefs*49) | Pathogenic        | GTPase | OPA1_000490 |
| Exon 15   | c.1429A>C                  | r.(?)    | p.(Ser477Arg)      | VUS               | GTPase | OPA1_000384 |
| Exon 15   | c.1441A>T                  | r.(?)    | p.(Met481Leu)      | VUS               | GTPase | OPA1_000405 |
| Exon 15   | c.1447A>C                  | r.(?)    | p.(Asn483His)      | Pathogenic        | GTPase | OPA1_000492 |
| Exon 16   | c.1499G>A                  | r.(?)    | p.(Arg500His)      | Pathogenic        | GTPase | OPA1_000104 |
| Exon 16   | c.1501A>T                  | r.(?)    | p.(Ser501Cys)      | VUS               | GTPase | OPA1_000406 |
| Exon 16   | c.1534C>A                  | r.(?)    | p.(Pro512Thr)      | VUS               | GTPase | OPA1_000383 |
| Exon 16   | c.1550C>T                  | r.(?)    | p.(Thr517Ile)      | Pathogenic        | GTPase | OPA1_000495 |
| Exon 16   | c.1555_1557del             | r.(?)    | p.(Phe519del)      | Pathogenic        | GTPase | OPA1_000312 |
| Exon 16   | c.1577T>C                  | r.(?)    | p.(Leu526Pro)      | Pathogenic        | GTPase | OPA1_000276 |
| Exon 16   | c.1599T>C                  | r.(=)    | p.(=)              | Likely benign     | GTPase | OPA1_000407 |
| Intron 16 | c.1608+1G>T                | r.(spl?) | p.?                | Likely pathogenic | GTPase | OPA1_000538 |
| Intron 16 | c.1608+2T>C                | r.spl    | p.(=)              | Pathogenic        | GTPase | OPA1_000496 |

|                         |                                                  |          |                    |                   |                    |             |                                                  |
|-------------------------|--------------------------------------------------|----------|--------------------|-------------------|--------------------|-------------|--------------------------------------------------|
| Exon 17                 | c.1609A>T                                        | r.(spl?) | p.(Ile537Phe)      | VUS               | GTPase             | OPA1_000385 |                                                  |
| Exon 17                 | c.1643T>A                                        | r.(?)    | p.(Met548Lys)      | VUS               | GTPase             | OPA1_000382 |                                                  |
| Exon 17                 | c.1645A>T                                        | r.(?)    | p.(Lys549*)        | Pathogenic        | GTPase             | OPA1_000421 |                                                  |
| Exon 17                 | c.1667T>A                                        | r.(?)    | p.(Val556Asp)      | Likely pathogenic | GTPase             | OPA1_000338 |                                                  |
| Intron 17               | c.1682-16del                                     | r.(?)    | p.(=)              | Likely benign     |                    | OPA1_000347 |                                                  |
| Exon 18                 | c.1714_1715del                                   | r.(?)    | p.(Glu572Ilefs*2)  | Pathogenic        | Dynamin<br>Central | OPA1_000497 |                                                  |
| Exon 18                 | c.1714_1715dup                                   | r.(?)    | p.(Tyr573Asnfs*13) | Pathogenic        | Dynamin<br>Central | OPA1_000498 |                                                  |
| Exon 18                 | c.1728_1734del                                   | r.(?)    | p.(Glu576fs)       | Pathogenic        | Dynamin<br>Central | OPA1_000350 |                                                  |
| Exon 18                 | c.1734del                                        | r.(?)    | p.(Gln579Argfs*6)  | Pathogenic        | Dynamin<br>Central | OPA1_000499 |                                                  |
| Intron 18               | c.1754+1G>A                                      | r.(?)    | p.(=)              | Pathogenic        | Dynamin<br>Central | OPA1_000501 |                                                  |
| Intron 18               | c.1754+2T>G                                      | r.spl    | p.(=)              | Pathogenic        | Dynamin<br>Central | OPA1_000502 |                                                  |
| Intron 18               | c.1754+22T>G                                     | r.(?)    | p.(=)              | VUS               | Dynamin<br>Central | OPA1_000379 |                                                  |
| Intron 18               | c.1755-75G>A                                     | r.(?)    | p.(=)              | VUS               | Dynamin<br>Central | OPA1_000378 |                                                  |
| Intron 18               | c.1755-5A>T                                      | r.(spl?) | p.?                | Likely benign     | Dynamin<br>Central | OPA1_000428 |                                                  |
| Exon 19                 | c.1806_1818del                                   | r.(?)    | p.(Val603Phefs*57) | Pathogenic        | Dynamin<br>Central | OPA1_000504 |                                                  |
| Exon 19                 | c.1808dup                                        | r.(?)    | p.(Ser604Ilefs*13) | Pathogenic        | Dynamin<br>Central | OPA1_000386 |                                                  |
| Intron 19               | c.1870+1G>C                                      | r.spl    | p.(=)              | Pathogenic        | Dynamin<br>Central | OPA1_000506 |                                                  |
| Intron 19               | c.1871-110C>T                                    | r.(?)    | p.(=)              | Benign            | Dynamin<br>Central | OPA1_000380 |                                                  |
| Exon 21                 | c.1939del                                        | r.(?)    | p.(Glu647Asnfs*17) | Pathogenic        | Dynamin<br>Central | OPA1_000508 |                                                  |
| Exon 21                 | c.1966A>G                                        | r.(?)    | p.(Ile656Val)      | VUS               | Dynamin<br>Central | OPA1_000429 |                                                  |
| Exon 21                 | c.1975G>T                                        | r.(?)    | p.(Glu659*)        | Pathogenic        | Dynamin<br>Central | OPA1_000509 |                                                  |
| Intron 21-<br>Intron 25 | c.(2012+1_2013-<br>1)_<br>(2520+1_2521-<br>1)dup | r.?      | p.?                | Likely pathogenic | Dynamin<br>Central | OPA1_000355 | Large duplication of exons<br>22-25 <sup>f</sup> |
| Exon 22                 | c.2044del                                        | r.(?)    | p.(Arg682Glufs*6)  | Pathogenic        | Dynamin<br>Central | OPA1_000511 |                                                  |
| Exon 22                 | c.2089C>T                                        | r.(?)    | p.(Gln697*)        | Pathogenic        | Dynamin<br>Central | OPA1_000513 |                                                  |
| Exon 22                 | c.2109T>C                                        | r.(=)    | p.(=)              | Likely benign     | Dynamin<br>Central | OPA1_000408 |                                                  |
| Exon 22                 | c.2119A>G                                        | r.(?)    | p.(Thr707Ala)      | Pathogenic        | Dynamin<br>Central | OPA1_000514 |                                                  |
| Exon 22                 | c.2126A>G                                        | r.(?)    | p.(Asp709Gly)      | Likely pathogenic | Dynamin<br>Central | OPA1_000391 |                                                  |
| Exon 22                 | c.2126del                                        | r.(?)    | p.(Asp709Valfs*17) | Pathogenic        | Dynamin<br>Central | OPA1_000515 |                                                  |
| Exon 22                 | c.2139dup                                        | r.(?)    | p.(Gln714Thrfs*4)  | Pathogenic        | Dynamin<br>Central | OPA1_000422 |                                                  |
| Exon 22                 | c.2154_2157del                                   | r.(?)    | p.(Lys718Asnfs*7)  | Pathogenic        | Dynamin<br>Central | OPA1_000387 |                                                  |
| Exon 22                 | c.2155C>T                                        | r.(?)    | p.(Gln719*)        | Pathogenic        | Dynamin<br>Central | OPA1_000316 |                                                  |
| Exon 22                 | c.2162del                                        | r.(?)    | p.(Pro721Leufs*5)  | Pathogenic        | Dynamin<br>Central | OPA1_000516 |                                                  |
| Exon 23                 | c.2213G>A                                        | r.(?)    | p.(Arg738His)      | VUS               | Dynamin<br>Central | OPA1_000409 |                                                  |
| Exon 23                 | c.2262del                                        | r.(?)    | p.(Lys754Asnfs*24) | Pathogenic        | Dynamin<br>Central | OPA1_000518 |                                                  |
| Exon 23                 | c.2267_2268del                                   | r.(?)    | p.(Lys756Argfs*4)  | Pathogenic        | Dynamin<br>Central | OPA1_000326 |                                                  |
| Exon 23                 | c.2313C>G                                        | r.(?)    | p.(Asp771Glu)      | Benign            | Dynamin<br>Central | OPA1_000410 |                                                  |
| Exon 24                 | c.2338_2339del                                   | r.(?)    | p.(Ile780Serfs*12) | Pathogenic        | Dynamin<br>Central | OPA1_000522 |                                                  |
| Intron 24               | c.2441-13T>G                                     | r.(?)    | p.?                | VUS               | Dynamin<br>Central | OPA1_000324 |                                                  |
| Exon 25                 | c.2459dup                                        | r.(?)    | p.(Asn820Lysfs*26) | Pathogenic        | Dynamin<br>Central | OPA1_000331 |                                                  |
| Exon 25                 | c.2475C>G                                        | r.(?)    | p.(Asp825Glu)      | VUS               | Dynamin<br>Central | OPA1_000351 |                                                  |

|                     |                             |          |                         |            |                  |             |                                            |
|---------------------|-----------------------------|----------|-------------------------|------------|------------------|-------------|--------------------------------------------|
| Exon 25             | c.2513A>G                   | r.(?)    | p.(Gln838Arg)           | Pathogenic | Dynamain Central | OPA1_000524 |                                            |
| Intron 25           | c.2520+2T>C                 | r.(spl?) | p.?                     | Pathogenic | Dynamain Central | OPA1_000411 |                                            |
| Intron 25           | c.2521-1G>T                 | r.spl    | p.?                     | Pathogenic | Dynamain Central | OPA1_000343 |                                            |
| Exon 26             | c.2619del                   | r.(?)    | p.(Lys874Argfs*8)       | Pathogenic | Dynamain Central | OPA1_000525 |                                            |
| Exon 26             | c.2657G>A                   | r.(?)    | p.(Ser886Asn)           | VUS        | Dynamain Central | OPA1_000381 |                                            |
| Exon 26             | c.2661G>A                   | r.(?)    | p.(=)                   | Pathogenic | Dynamain Central | OPA1_000526 |                                            |
| Exon 27             | c.2694A>T                   | r.(?)    | p.(Arg898Ser)           | VUS        |                  | OPA1_000412 |                                            |
| Exon 27             | c.2709A>G                   | r.(=)    | p.(=)                   | Benign     |                  | OPA1_000413 |                                            |
| Intron 27           | c.2779-1G>T                 | r.spl    | p.?                     | Pathogenic |                  | OPA1_000345 |                                            |
| Exon 28             | c.2796_2798del              | r.(?)    | p.(Val933del)           | VUS        |                  | OPA1_000274 |                                            |
| Exon 28             | c.2806dup                   | r.(?)    | p.(Trp936fs)            | Pathogenic |                  | OPA1_000275 |                                            |
| Exon 28             | c.2809C>G                   | r.(?)    | p.(Arg937Gly)           | VUS        |                  | OPA1_000414 |                                            |
| Intron 28           | c.2873-163G>A               | r.(?)    | p.(=)                   | Benign     |                  | OPA1_000388 |                                            |
| Intron 28           | c.2873-2_2874del            | r.?      | p.?                     | Pathogenic |                  | OPA1_000415 |                                            |
| Exon 29             | c.2884G>T                   | r.(?)    | p.(Glu962*)             | Pathogenic | Putative GED     | OPA1_000339 |                                            |
| Exon 29             | c.2890_2891insTTA           | r.(?)    | p.(Lys963_Asn964insIle) | VUS        | Putative GED     | OPA1_000334 |                                            |
| Exon 29             | c.2899G>T                   | r.(?)    | p.(Glu967*)             | Pathogenic | Putative GED     | OPA1_000533 |                                            |
| Exon 29             | c.2948T>C                   | r.(?)    | p.(Leu983Pro)           | Pathogenic | Putative GED     | OPA1_000534 |                                            |
| Exon 29             | c.2983A>T                   | r.(?)    | p.(Lys995*)             | Pathogenic | Putative GED     | OPA1_000535 |                                            |
| Exon 29-Intron 29   | c.2983_2983+1del            | r.spl    | p.?                     | Pathogenic | Putative GED     | OPA1_000317 |                                            |
| Intron 29-Intron 31 | c.(2983+1_2984-1)(*20_?)del | r.spl    | p.?                     | Pathogenic | Putative GED     | OPA1_000346 | Large deletion of exons 30-31 <sup>f</sup> |
| Intron 29           | c.2984-4A>G                 | r.(spl?) | p.?                     | Benign     | Putative GED     | OPA1_000416 |                                            |
| Exon 30             | c.2988dup                   | r.(?)    | p.(Val997Serfs*2)       | Pathogenic | Putative GED     | OPA1_000305 |                                            |
| Exon 30             | c.3001C>T                   | r.(?)    | p.(Gln1001*)            | Pathogenic | Putative GED     | OPA1_000352 |                                            |
| Exon 30             | c.3010C>A                   | r.(?)    | p.(Leu1004Ile)          | VUS        | Putative GED     | OPA1_000417 |                                            |

*Note:* Data as of October 12, 2018; for more information, please refer to the database using Database-ID.

<sup>a</sup>Mutational data are described using the nomenclature of the Human Genome Variation Society

(<http://www.hgvs.org/mutnomen>). Nucleotide numbering reflects cDNA numbering with “+1”

corresponding to the A of the ATG translation initiation codon in the reference sequence (*OPA1* transcript variant 8, RefSeq: NM\_130837.2), according to journal guidelines. The initiation codon is codon 1.

<sup>b</sup>Predicted effect on protein based on clinical consequences

<sup>c</sup>Classification of variant based on clinical consequences, using standardized criteria: pathogenic (disease-associated), likely pathogenic (likely disease-associated), VUS (variant of unknown significance), likely benign (likely not disease-associated), benign (not disease-associated).

<sup>d</sup>Affected domain of the protein: basic domain (mitochondrial target peptide, exons 1–3), GTPase domain (exons 10–17), dynamin central region (exons 18–26), region probably corresponding to a GTPase effector domain (GED, exons 29–30).

<sup>e</sup>Identifier of variant in the *OPAI* database (<https://www.lovd.nl/OPAI>).

<sup>f</sup>Break points have not been fully characterized
